1 **Diagnostic and prognostic value of hematological and**  
2 **immunological markers in COVID-19 infection: A meta-**  
3 **analysis of 6320 patients**

4 Rami M. Elshazli<sup>1</sup>, Eman A Toraih<sup>2,3</sup>, Abdelaziz Elgaml<sup>4,5</sup>, Mohammed El-Mowafy<sup>4</sup>, Mohamed  
5 El-Mesery<sup>6</sup>, Mohamed Nasreldien Amin<sup>6</sup>, Mohammad H Hussein<sup>2</sup>, Mary T. Killackey<sup>7</sup>, Manal S  
6 Fawzy<sup>8\*</sup>, Emad Kandil<sup>9\*</sup>

7 <sup>1</sup> *Department of Biochemistry and Molecular Genetics, Faculty of Physical Therapy, Horus*  
8 *University - Egypt, New Damietta, 34517, Egypt.*

9 <sup>2</sup> *Department of Surgery, Tulane University, School of Medicine, New Orleans, Louisiana, USA*

10 <sup>3</sup> *Genetics Unit, Department of Histology and Cell Biology, Faculty of Medicine, Suez Canal*  
11 *University, Ismailia, Egypt*

12 <sup>4</sup> *Department of Microbiology and Immunology, Faculty of Pharmacy, Mansoura University,*  
13 *Mansoura 35516, Egypt.*

14 <sup>5</sup> *Department of Microbiology, Faculty of Pharmacy, Horus University - Egypt, New Damietta,*  
15 *34517, Egypt.*

16 <sup>6</sup> *Department of Biochemistry, Faculty of Pharmacy, Mansoura University, Mansoura 35516,*  
17 *Egypt.*

18 <sup>7</sup> *Tulane Transplant Institute, Tulane University, School of Medicine, New Orleans, LA, USA*

19 <sup>8</sup> *Department of Medical Biochemistry, Faculty of Medicine, Suez Canal University, Ismailia,*  
20 *Egypt*

21 <sup>9</sup> *Division of Endocrine and Oncologic Surgery, Department of Surgery, Tulane University,*  
22 *School of Medicine, New Orleans, LA, USA*

23

24 **\*Correspondence authors**

25 Email: [ekandil@tulane.edu](mailto:ekandil@tulane.edu) (EK)

26 Email: [manal\\_mohamed@med.suez.edu.eg](mailto:manal_mohamed@med.suez.edu.eg) (MSF)

27 **Short Title:** COVID-19 infection and laboratory markers

## 28 **Abstract**

### 29 **Objective**

30 Evidence-based characterization of the diagnostic and prognostic value of the  
31 hematological and immunological markers related to the epidemic of Coronavirus  
32 Disease 2019 (COVID-19) is critical to understand the clinical course of the  
33 infection and to assess in development and validation of biomarkers.

### 34 **Methods**

35 Based on systematic search in Web of Science, PubMed, Scopus, and Science  
36 Direct up to April 22, 2020, a total of 52 eligible articles with 6,320 laboratory-  
37 confirmed COVID-19 cohorts were included. Pairwise comparison between severe  
38 *versus* mild disease, Intensive Care Unit (ICU) *versus* general ward admission, and  
39 expired *versus* survivors were performed for 36 laboratory parameters. The pooled  
40 standardized mean difference (SMD) and 95% confidence intervals (CI) were  
41 calculated using the DerSimonian Laird method/random effects model and  
42 converted to Odds ratio (OR). The decision tree algorithm was employed to  
43 identify the key risk factor(s) attributed to severe COVID-19 disease.

### 44 **Results**

45 Cohorts with elevated levels of white blood cells (WBCs) (OR=1.75), neutrophil  
46 count (OR=2.62), D-dimer (OR=3.97), prolonged prothrombin time (PT)  
47 (OR=1.82), fibrinogen (OR=3.14), erythrocyte sedimentation rate (OR=1.60),

48 procalcitonin (OR=4.76), IL-6 (OR=2.10), and IL-10 (OR=4.93) had higher odds  
49 of progression to severe phenotype. Decision tree model (sensitivity=100%,  
50 specificity=81%) showed the high performance of neutrophil count at a cut-off  
51 value of more than  $3.74 \times 10^9/L$  for identifying patients at high risk of severe  
52 COVID-19. Likewise, ICU admission was associated with higher levels of WBCs  
53 (OR=5.21), neutrophils (OR=6.25), D-dimer (OR=4.19), and prolonged PT  
54 (OR=2.18). Patients with high IL-6 (OR=13.87), CRP (OR=7.09), D-dimer  
55 (OR=6.36), and neutrophils (OR=6.25) had the highest likelihood of mortality.

## 56 **Conclusions**

57 Several hematological and immunological markers, in particular neutrophilic  
58 count, could be helpful to be included within the routine panel for COVID-19  
59 infection evaluation to ensure risk stratification and effective management.

60

61 **Keywords:** COVID-19; laboratory markers; mortality; prognosis; SARS-CoV-2

62

63

64 **Short Title:** COVID-19 infection and laboratory markers

65

66

67

## 68 **Introduction**

69 Coronavirus disease – 2019 (COVID-19) is a disease that was detected in  
70 December 2019 in Wuhan, China, and led to the risk of mortality of about 2% [1].  
71 This disease is caused due to infection with a recently arising zoonotic virus known  
72 as the Severe Acute Respiratory Syndrome Coronavirus 2 (SARS-CoV-2) [2].  
73 Previously, infection with coronaviruses appeared in 2002 within China in the  
74 form of SARS-CoV, and it appeared later also in 2012 within Saudi Arabia that  
75 was known as Middle East Respiratory Syndrome (MERS-CoV) [3, 4]. All these  
76 coronaviruses are enveloped positive-strand RNA viruses that are isolated from  
77 bats that can be transferred from animals to humans, human to human, and animals  
78 to animals [5]. They share a similarity in the clinical symptoms in addition to  
79 specific differences that have been recently observed [5-7]. The symptoms of this  
80 disease appear with different degrees that start in the first seven days with mild  
81 symptoms such as fever, cough, shortness of breath, and fatigue [8]. Afterward,  
82 critical symptoms may develop in some patients involving dyspnea and pneumonia  
83 that require patient's management in intensive care units to avoid the serious  
84 respiratory complications that may lead to death [9]. However, there are no  
85 specific symptoms to diagnose coronavirus infection, and accurate testing depends  
86 on the detection of the viral genome using the reverse transcription-polymerase  
87 chain reaction (RT-PCR) analysis [10].

88 Unfortunately, COVID-19 is not limited to its country of origin, but it has spread  
89 all over the world. Therefore, there is no wonder emerging research has been  
90 directed to provide information and clinical data of patients infected with this virus  
91 that may help to not only to the early detection in different patient categories, but it  
92 will also help in the characterization of the viral complications with other chronic  
93 diseases [1, 2, 6, 9]. However, there is no sufficient data that characterize the  
94 changes in the hematological and immunological parameters in COVID-19  
95 patients. In the current comprehensive meta-analysis study, we aimed to analyze  
96 different hematological, inflammatory, and immunological markers in COVID-19  
97 patients at different clinical stages in different countries that may help in the early  
98 detection of COVID-19 infection and to discriminate between severity status of the  
99 disease to decrease the death risk.

## 100 **Materials and Methods**

### 101 **Search strategy**

102 This current meta-analysis was carried out according to the Preferred Reporting  
103 Items for Systematic reviews and Meta-analysis (PRISMA) statement [11] (**Table**  
104 **S1**). Relevant literature was retrieved from Web of Science, PubMed, Scopus, and  
105 Science Direct search engines up to April 22, 2020. Our search strategy included  
106 the following terms: “Novel coronavirus 2019”, “2019 nCoV”, “COVID-19”,

107 “Wuhan coronavirus,” “Wuhan pneumonia,” or “SARS-CoV-2”. Besides, we  
108 manually screened out the relevant potential article in the references selected. The  
109 above process was performed independently by three participants.

## 110 **Study selection**

111 No time or language restriction was applied. Inclusion criteria were as follows: (1)  
112 Types of Studies: retrospective, prospective, observational, descriptive or case  
113 control studies reporting laboratory features of COVID-19 patients; (2) Subjects:  
114 diagnosed patients with COVID-19 (3) Exposure intervention: COVID-19 patients  
115 diagnosed with Real Time-Polymerase Chain Reaction, radiological imaging, or  
116 both; with hematological testing included: complete blood picture (white blood  
117 cells, neutrophil count, lymphocyte count, monocyte count, eosinophils count,  
118 basophils, red blood cells, hemoglobin, hematocrit, and platelet count), coagulation  
119 profile (prothrombin time, international normalized ratio, activated partial  
120 thromboplastin time, thrombin time, fibrinogen, and D-dimer) or immunological  
121 parameters including inflammatory markers (ferritin, erythrocyte sedimentation  
122 rate, procalcitonin, and C-reactive protein), immunoglobulins (IgA, IgG, and IgM),  
123 complement tests (C3 and C4), interleukins (IL-4, IL-6, IL-8, IL-10, IL-2R, and  
124 TNF- $\alpha$ ), and immune cells (B lymphocytes, T lymphocytes, CD4<sup>+</sup> T cells, and  
125 CD8<sup>+</sup> T cells); and (4) Outcome indicator: the mean and standard deviation or  
126 median and interquartile range for each laboratory test. The following exclusion

127 criteria were considered: (1) Case reports, reviews, editorial materials, conference  
128 abstracts, summaries of discussions, (2) Insufficient reported data information; or  
129 (3) *In vitro* or *in vivo* studies.

### 130 **Data abstraction**

131 Four investigators separately conducted literature screening, data extraction, and  
132 literature quality evaluation, and any differences were resolved through another  
133 two reviewers. Information extracted from eligible articles in a predesigned form  
134 in excel, including the last name of the first author, date and year of publication,  
135 journal name, study design, country of the population, sample size, and quality  
136 assessment.

### 137 **Quality assessment**

138 A modified version of the Newcastle-Ottawa scale (NOS) was adopted to evaluate  
139 the process in terms of queue selection, comparability of queues, and evaluation of  
140 results [12, 13]. The quality of the included studies was assessed independently by  
141 three reviewers, and disagreements were resolved by the process described above.  
142 Higher NOS scores showed a higher literature quality. NOS scores of at least six  
143 were considered high-quality literature.

### 144 **Statistical analysis**

145 All data analysis was performed using OpenMeta[Analyst] [14] and  
146 comprehensive meta-analysis software version 3.0 [15]. First, a single-arm  
147 meta-analysis for laboratory tests was performed. The standardized mean  
148 difference (SMD) and 95% confidence intervals (CI) were used to estimate pooled  
149 results from studies. Medians and interquartile range were converted to mean and  
150 standard deviation (SD) using the following formulas:  $[\text{Mean}=(Q1+\text{median}+Q3)/3]$   
151 and  $[\text{SD}=\text{IQR}/1.35]$ , whereas, values reported in the articles as mean and 95%CI  
152 were estimated using the following formula  $[\text{SD}=\sqrt{N} * (\text{Upper limit of CI} - \text{Lower}$   
153  $\text{limit of CI})/3.92]$ . A continuous random-effect model was applied using the  
154 DerSimonian-Laird (inverse variance) method [16, 17].

155 Next, in the presence of individual patient data, single-armed observed values were  
156 converted to two-armed data to act as each other's control group based on  
157 covariate information. Only studies investigating different outcomes were  
158 considered as potential matched pairs, and two-arm meta-analysis was applied to  
159 compare between mild *versus* severe COVID-19 infection (based on the results of  
160 the chest radiography, clinical examination, and symptoms), ICU admission *versus*  
161 general ward admission, and expired *versus* survivors. Meta-analysis for each  
162 outcome was processed using a random-effects model since heterogeneity among  
163 studies was expected. For severity pairwise comparison, estimates of SMD served  
164 as quantitative measures of the strength of evidence against the null hypothesis of



165 no difference in the population between mild and severe COVID-19  
166 manifestations. SMD of <0.2, 0.2-0.8, and >0.8 indicated mild, moderate, and  
167 severe strength. For ICU admission and survival analysis, overall effect size  
168 estimates in SMD were then converted to the odds ratio (OR) with 95%CI for  
169 better interpretation by clinical domains.

### 170 **Decision tree to identify predictors for poor outcomes**

171 Using laboratory features for clinical prediction, the decision tree algorithm was  
172 employed to identify the key risk factors attributed to severe COVID-19 infection.  
173 The accuracy of the model was measured by the Area Under the Receiver  
174 Operating Characteristic (ROC) Curve (AUC), which depicts the true positive rate  
175 versus the false positive rate at various discrimination thresholds. The markers that  
176 have the highest AUC were identified, and the sensitivity and specificity of the cut-  
177 off threshold level were determined. R Studio was employed using the following  
178 packages: *tidyverse*, *magrittr*, *rpart*, *caret*, and *pROC*.

### 179 **Trial sequential analysis (TSA)**

180 The statistical trustworthiness of this meta-analysis assessment was conducted  
181 using TSA through combining the cumulative sample sizes of all appropriate  
182 records with the threshold of statistical impact to diminish the accidental errors and  
183 enhance the intensity of expectations [18]. Two side trials with “type I error ( $\alpha$ )”

184 along with power set at 5% and 80% were employed. In the case of the “Z-curve”  
185 traverses the TSA monitoring boundaries, a reasonable degree of impact was  
186 accomplished, and no supplementary trials are crucial. Nevertheless, in case of the  
187 “Z-curve” failed to achieve the boundary limits, the estimated information size has  
188 not accomplished the required threshold to attract appropriate decisions and  
189 advance trials are mandatory. TSA platform (version 0.9.5.10 beta) was operated in  
190 the experiment.

### 191 **Assessment of heterogeneity and publication bias**

192 After that, the heterogeneity was evaluated using Cochran’s Q statistic and  
193 quantified by using  $I^2$  statistics, which represents an estimation of the total  
194 variation across studies beyond chance. Articles were considered to have  
195 significant heterogeneity between studies when the p-value less than 0.1 or  $I^2$   
196 greater than 50%. Subgroup analysis was performed based on the study sample  
197 size ( $\leq 50$  patients compared to  $> 50$  patients) and the origin of patients (Wuhan city  
198 versus others). In addition, sensitivity analyses and meta-regression with the  
199 random-effects model using restricted maximum likelihood algorithm were  
200 conducted to explore potential sources of heterogeneity.

201 Finally, publication bias was assessed using a funnel plot and quantified using  
202 Begg’s and Mazumdar rank correlation with continuity correction and Egger’s  
203 linear regression tests. Asymmetry of the collected studies’ distribution by visual

204 inspection or P-value  $< 0.1$  indicated obvious publication bias [19]. The Duval and  
205 Tweedie's trim and fill method's assumption were considered to reduce the bias in  
206 pooled estimates [20].

## 207 **Results**

### 208 **Literature search**

209 A flowchart outlining the systematic review search results is described in **Fig 1A**.  
210 A total of 4752 records were identified through four major electronic databases till  
211 April 22, 2020 including Web of Science (n = 557), PubMed (n = 1688), Scopus (n  
212 = 1105) and Science Direct (n = 1402). Upon reviewing the retrieved articles, a  
213 total of 1230 records were excluded for duplication, and 3522 unique records were  
214 initially identified. Following screening of titles and abstracts, several studies were  
215 excluded for being case records (n = 44), review articles (n = 262), irrelevant  
216 publications (n = 1355), or editorial materials (n = 1809). The resulted 424 full-text  
217 publications were further assessed for eligibility, during which 372 records were  
218 removed for lacking sufficient laboratory data. Ultimately, a total of 52 eligible  
219 articles were included for the quantitative synthesis of this meta-analysis study,  
220 with 52 records represented single-arm analysis, 16 records represented two-arms  
221 severity analysis; meanwhile, 7 and 4 records were utilized for survival and ICU  
222 admission analyses, respectively.

223 **Fig 1. Literature search process.**

224 (A) Workflow for screening and selecting relevant articles. (B) Map showing the  
225 location of the studies. Studies conducted in China (red), Taiwan (green),  
226 Singapore (blue), and USA (light blue) are shown with the number of studies  
227 between brackets. Data source Tableau 2020.1 Desktop Professional Edition  
228 (<https://www.tableau.com/>).

229 **Characteristics of the included studies**

230 Our review included 52 studies that were published from January 24 through April  
231 22, 2020, including 48 articles from China [Wuhan (30), Chongqing (4), Zhejiang  
232 (4), Shanghai (2), Ningbo (1), Hong Kong (1), Shenzhen (1), Anhui (1), Macau  
233 (1), Hainan (1), Jiangsu (1), and Beijing (1)], two articles from Singapore  
234 [Singapore and Sengkang], one article from Taiwan [Taichung], and one article  
235 from USA [Washington] (**Fig 1B**). The main characteristics of eligible studies are  
236 shown in **Table 1**. A total of 6320 patients with SARS-CoV-2 infection were  
237 enrolled across the articles. Most records (n = 47) were retrospective case studies,  
238 while other study design included two prospective cohort studies, one  
239 observational cohort study, one descriptive case series, and one case-control study.  
240 Our team stratified 36 different laboratory parameters into seven subclasses,  
241 including complete blood picture, coagulation profile, immunological markers,  
242 immunoglobulins, complement tests, interleukins, and immune cells, as previously  
243 described in the methodology. Regarding quality score assessment, 39 studies  
244 achieved a score higher than six out of a maximum of nine (high quality), while the

245 remaining 13 studies earned a score equal or lower than six (low quality), as shown  
246 in **Table 1**.

**Table 1. General characteristics of the included studies**

| First Author | Year | Publication date (dd-mm) | Journal name                           | Continent  | Country | Study design               | Sample size | Quality score | Reference no |
|--------------|------|--------------------------|----------------------------------------|------------|---------|----------------------------|-------------|---------------|--------------|
| Zhu Z        | 2020 | 22-April                 | International J of Infectious Diseases | Ningbo     | China   | Retrospective case study   | 127         | 9             | [35]         |
| Liu X        | 2020 | 20-April                 | Acta Pharm Sin B                       | Wuhan      | China   | Retrospective case study   | 124         | 8             | [36]         |
| Chen X       | 2020 | 18-April                 | Clin Infect Dis                        | Wuhan      | China   | Retrospective case study   | 48          | 9             | [37]         |
| Chen G       | 2020 | 13-April                 | J Clinical Invest                      | Wuhan      | China   | Retrospective case study   | 21          | 8             | [38]         |
| He R         | 2020 | 12-April                 | J Clinical Virology                    | Wuhan      | China   | Retrospective case study   | 204         | 9             | [27]         |
| Zhang G      | 2020 | 09-April                 | J Clinical Virology                    | Wuhan      | China   | Retrospective case study   | 221         | 9             | [39]         |
| Lei S        | 2020 | 04-April                 | EClinicalMedicine                      | Wuhan      | China   | Retrospective case study   | 34          | 9             | [40]         |
| Wang L       | 2020 | 30-March                 | Journal of Infection                   | Wuhan      | China   | Retrospective case study   | 339         | 8             | [41]         |
| Guo T        | 2020 | 27-March                 | JAMA Cardiology                        | Wuhan      | China   | Retrospective case study   | 187         | 8             | [42]         |
| Zheng C      | 2020 | 27-March                 | Int J Infect Dis                       | Wuhan      | China   | Retrospective case study   | 55          | 7             | [43]         |
| Chen T       | 2020 | 26-March                 | BMJ                                    | Wuhan      | China   | Retrospective case study   | 274         | 9             | [9]          |
| Tang X       | 2020 | 26-March                 | Chest                                  | Wuhan      | China   | Retrospective case study   | 73          | 6             | [44]         |
| Shi S        | 2020 | 25-March                 | JAMA Cardiology                        | Wuhan      | China   | Retrospective case study   | 416         | 9             | [45]         |
| TO K         | 2020 | 23-March                 | Lancet Infectious Diseases             | Hong Kong  | China   | Observational cohort study | 23          | 9             | [46]         |
| Zhou Z       | 2020 | 24-March                 | Eur Radiol                             | Chongqing  | China   | Retrospective case study   | 62          | 9             | [47]         |
| Chen Z       | 2020 | 24-March                 | European Journal of Radiology          | Zhejiang   | China   | Retrospective case study   | 98          | 6             | [48]         |
| Wan S        | 2020 | 21-March                 | J Med Virol                            | Chongqing  | China   | Retrospective case study   | 135         | 9             | [49]         |
| Cheng Y      | 2020 | 20-March                 | Kidney International                   | Wuhan      | China   | Prospective cohort study   | 701         | 9             | [50]         |
| Luo S        | 2020 | 20-March                 | Clin Gastroenterol Hepatol             | Wuhan      | China   | Retrospective case study   | 183         | 5             | [51]         |
| Deng Y       | 2020 | 20-March                 | Chin Med J (Engl)                      | Wuhan      | China   | Retrospective case study   | 225         | 8             | [52]         |
| Arentz M     | 2020 | 19-March                 | JAMA                                   | Washington | USA     | Retrospective case study   | 21          | 5             | [53]         |
| Chen J       | 2020 | 19-March                 | Journal of Infection                   | Shanghai   | China   | Retrospective case study   | 249         | 5             | [54]         |
| Cai Q        | 2020 | 18-March                 | Engineering                            | Shenzhen   | China   | Retrospective case study   | 80          | 9             | [55]         |
| Gao Y        | 2020 | 17-March                 | J Med Virol                            | Anhui      | China   | Retrospective case study   | 43          | 9             | [56]         |
| Qian G       | 2020 | 17-March                 | QJM                                    | Zhejiang   | China   | Retrospective case study   | 91          | 5             | [57]         |
| Mo P         | 2020 | 16-March                 | Clin Infect Dis                        | Wuhan      | China   | Retrospective case study   | 155         | 8             | [58]         |
| Wang Z       | 2020 | 16-March                 | Clin Infect Dis                        | Wuhan      | China   | Retrospective case study   | 69          | 7             | [59]         |
| Lo I         | 2020 | 15-March                 | Int J Biol Sci                         | Macau      | China   | Retrospective case study   | 10          | 8             | [60]         |
| Cheng Z      | 2020 | 14-March                 | AJR Am J Roentgenol                    | Shanghai   | China   | Retrospective case study   | 11          | 5             | [61]         |
| Hsieh W      | 2020 | 13-March                 | J Microbiol Immunol Infect             | Taichung   | Taiwan  | Retrospective case study   | 2           | 5             | [62]         |
| Wu C         | 2020 | 13-March                 | JAMA Internal Medicine                 | Wuhan      | China   | Retrospective case study   | 201         | 8             | [63]         |
| Qin C        | 2020 | 12-March                 | Clin Infect Dis                        | Wuhan      | China   | Retrospective case study   | 452         | 9             | [64]         |
| Zhao D       | 2020 | 12-March                 | Clin Infect Dis                        | Wuhan      | China   | Case-control study         | 19          | 7             | [65]         |

|         |      |             |                                          |           |           |                          |     |   |      |
|---------|------|-------------|------------------------------------------|-----------|-----------|--------------------------|-----|---|------|
| Liu K   | 2020 | 11-March    | Journal of Infection                     | Hainan    | China     | Retrospective case study | 18  | 7 | [66] |
| Zhou F  | 2020 | 09-March    | The Lancet                               | Wuhan     | China     | Retrospective case study | 191 | 9 | [67] |
| Xiong Y | 2020 | 07-March    | Invest Radiol                            | Wuhan     | China     | Retrospective case study | 42  | 5 | [68] |
| Fan B   | 2020 | 04-March    | American journal of hematology           | Singapore | Singapore | Retrospective case study | 67  | 9 | [69] |
| Young B | 2020 | 03-March    | JAMA                                     | Sengkang  | Singapore | Descriptive case series  | 18  | 7 | [70] |
| Wu J    | 2020 | 29-February | Clin Infect Dis                          | Jiangsu   | China     | Retrospective case study | 80  | 7 | [71] |
| Li K    | 2020 | 29-February | Invest Radiol                            | Chongqing | China     | Retrospective case study | 83  | 9 | [72] |
| Liu W   | 2020 | 28-February | Chin Med J (Engl)                        | Wuhan     | China     | Retrospective case study | 78  | 9 | [73] |
| Yang W  | 2020 | 26-February | Journal of Infection                     | Zhejiang  | China     | Retrospective case study | 149 | 6 | [74] |
| Wu J    | 2020 | 25-February | Invest Radiol                            | Chongqing | China     | Retrospective case study | 80  | 6 | [75] |
| Shi H   | 2020 | 24-February | Lancet Infectious Diseases               | Wuhan     | China     | Retrospective case study | 81  | 7 | [76] |
| Yang X  | 2020 | 24-February | The Lancet Respiratory Medicine          | Wuhan     | China     | Retrospective case study | 52  | 9 | [77] |
| Zhang J | 2020 | 23-February | Allergy                                  | Wuhan     | China     | Retrospective case study | 138 | 9 | [78] |
| Zhou W  | 2020 | 21-February | Signal Transduction and Targeted Therapy | Wuhan     | China     | Retrospective case study | 15  | 8 | [79] |
| Xu X    | 2020 | 19-February | BMJ                                      | Zhejiang  | China     | Retrospective case study | 62  | 7 | [80] |
| Pan F   | 2020 | 13-February | Radiology                                | Wuhan     | China     | Retrospective case study | 21  | 6 | [81] |
| Chang D | 2020 | 07-February | JAMA                                     | Beijing   | China     | Retrospective case study | 13  | 6 | [82] |
| Wang D  | 2020 | 07-February | JAMA                                     | Wuhan     | China     | Retrospective case study | 138 | 9 | [83] |
| Huang C | 2020 | 24-January  | The Lancet                               | Wuhan     | China     | Prospective cohort study | 41  | 9 | [1]  |

248 **Pooled estimates of laboratory parameters: Single-arm Meta-**  
 249 **analysis**

250 The final pooled estimates of single-arm meta-analysis included 52 eligible  
 251 articles. The pooled mean of laboratory parameters and 95%CI among SARS-  
 252 CoV-2 infected patients, including hematological, immunological, and  
 253 inflammatory variables, is illustrated in **Table 2**. Our results depicted a wide  
 254 variability between studies for each laboratory marker. Apart from  
 255 immunoglobulins, IL-2R, and IL-8, significant heterogeneity was observed.  
 256 Subgroup analysis by sample size and city of origin and sensitivity analysis failed  
 257 to reveal the source of variation for each parameter. Additionally, meta-regression  
 258 also rendered insignificant results.

259  
 260 **Table 2. Pooled estimates of single-arm meta-analysis for laboratory**  
 261 **parameters in COVID-19 patients**

| Laboratory testing         | Number studies | Sample size | Estimate | 95% CI       | P-value | Q      | P-value | I <sup>2</sup> | T <sup>2</sup> |
|----------------------------|----------------|-------------|----------|--------------|---------|--------|---------|----------------|----------------|
| <b>CBC</b>                 |                |             |          |              |         |        |         |                |                |
| White blood cells          | 47             | 5967        | 5.82     | 5.24, 6.40   | <0.001  | 7136.1 | <0.001  | 99.35          | 3.83           |
| Neutrophil count           | 31             | 3814        | 3.70     | 3.48, 3.92   | <0.001  | 525.8  | <0.001  | 93.9           | 0.31           |
| Lymphocyte count           | 45             | 6017        | 0.99     | 0.91, 1.08   | <0.001  | 7645.2 | <0.001  | 99.3           | 0.07           |
| Monocyte count             | 18             | 2586        | 0.42     | 0.39, 0.44   | <0.001  | 263.7  | <0.001  | 93.5           | 0.003          |
| Eosinophils count          | 4              | 546         | 0.02     | 0.01, 0.024  | <0.001  | 10.6   | 0.014   | 71.6           | 0.0            |
| Red blood cells            | 2              | 507         | 4.42     | 3.81, 4.67   | <0.001  | 50.8   | <0.001  | 98.03          | 0.095          |
| Hemoglobin                 | 26             | 3114        | 129.1    | 125.0, 133.3 | <0.001  | 1504.3 | <0.001  | 98.3           | 103.4          |
| Platelet count             | 34             | 4347        | 178.4    | 171.9, 184.9 | <0.001  | 390.2  | <0.001  | 91.5           | 273.5          |
| <b>Coagulation profile</b> |                |             |          |              |         |        |         |                |                |



|                             |    |      |       |               |        |         |        |       |         |
|-----------------------------|----|------|-------|---------------|--------|---------|--------|-------|---------|
| Prothrombin time            | 22 | 3287 | 12.38 | 11.8, 12.9    | <0.001 | 3415.7  | <0.001 | 99.3  | 1.905   |
| APTT                        | 19 | 3023 | 31.8  | 30.2, 33.4    | <0.001 | 1312.1  | <0.001 | 98.6  | 11.96   |
| Thrombin time               | 2  | 754  | 21.9  | 8.29, 35.57   | 0.002  | 1908.1  | <0.001 | 99.94 | 96.86   |
| D-dimer                     | 27 | 3857 | 1.25  | 0.67, 1.82    | <0.001 | 40947.5 | <0.001 | 99.9  | 2.22    |
| Fibrinogen                  | 2  | 781  | 2.45  | 0.61, 4.29    | 0.009  | 46.19   | <0.001 | 97.83 | 1.729   |
| <b>Inflammatory markers</b> |    |      |       |               |        |         |        |       |         |
| Ferritin                    | 8  | 528  | 889.5 | 773.2, 1005.7 | <0.001 | 16.61   | 0.020  | 57.8  | 14138.9 |
| ESR                         | 13 | 1013 | 37.85 | 29.07, 46.6   | <0.001 | 692.4   | <0.001 | 98.26 | 239.7   |
| Procalcitonin               | 25 | 3010 | 0.10  | 0.07, 0.12    | <0.001 | 3913.6  | <0.001 | 99.3  | 0.003   |
| C-reactive protein          | 36 | 4409 | 28.11 | 24.7, 31.4    | <0.001 | 3432.1  | <0.001 | 98.9  | 79.35   |
| <b>Immunoglobulins</b>      |    |      |       |               |        |         |        |       |         |
| IgA                         | 2  | 101  | 2.21  | 2.15, 2.27    | <0.001 | 0.089   | 0.76   | 0.0   | 0.0     |
| IgG                         | 2  | 101  | 11.54 | 11.2, 11.8    | <0.001 | 1.88    | 0.17   | 46.9  | 0.023   |
| IgM                         | 2  | 101  | 1.00  | 0.96, 1.04    | <0.001 | 1.11    | 0.29   | 10.32 | 0.0     |
| <b>Complement test</b>      |    |      |       |               |        |         |        |       |         |
| C3                          | 2  | 101  | 0.95  | 0.80, 1.10    | <0.001 | 28.02   | <0.001 | 96.43 | 0.011   |
| C4                          | 2  | 101  | 0.24  | 0.21, 0.27    | <0.001 | 28.08   | <0.001 | 96.44 | 0.0     |
| <b>Interleukins</b>         |    |      |       |               |        |         |        |       |         |
| IL-2R                       | 2  | 101  | 762.3 | 732.4, 792.2  | <0.001 | 0.33    | 0.56   | 0.0   | 0.0     |
| IL-4                        | 2  | 276  | 2.98  | 1.09, 4.87    | 0.002  | 958.765 | <0.001 | 99.9  | 1.85    |
| IL-6                        | 12 | 926  | 11.56 | 9.82, 13.3    | <0.001 | 144.7   | <0.001 | 92.4  | 6.19    |
| IL-8                        | 2  | 101  | 18.4  | 17.08, 19.84  | <0.001 | 1.54    | 0.21   | 35.3  | 0.39    |
| IL-10                       | 3  | 292  | 6.33  | 4.39, 8.27    | <0.001 | 133.1   | <0.001 | 98.4  | 2.89    |
| TNF- $\alpha$               | 3  | 292  | 6.72  | 1.33, 12.12   | 0.015  | 2933.6  | <0.001 | 99.9  | 22.7    |
| <b>Immune cells</b>         |    |      |       |               |        |         |        |       |         |
| CD4 <sup>+</sup> T cells    | 6  | 296  | 361.1 | 254.0, 468.2  | <0.001 | 88.7    | <0.001 | 94.3  | 15973.1 |
| CD8 <sup>+</sup> T cells    | 5  | 285  | 219.6 | 157.1, 282.0  | <0.001 | 46.17   | <0.001 | 91.3  | 4437.2  |
| T lymphocytes               | 2  | 167  | 704.3 | 254.5, 1154.0 | 0.002  | 27.6    | <0.001 | 96.3  | 101500  |

262 Test of association: standardized mean difference, Random model. 95% CI: 95% confidence interval, Q statistic: a measure of  
 263 weighted squared deviations that denotes the ratio of the observed variation to the within-study error,  $I^2$ : the ratio of true  
 264 heterogeneity to total observed variation,  $T^2$ : Tau squared, and it is referred to the extent of variation among the effects  
 265 observed in different studies. Laboratory markers (INR and B lymphocytes) were reported in only one study thus were not  
 266 shown. CBC: Complete blood picture, APTT: Activated partial thromboplastin time, ESR: Erythrocyte sedimentation rate. Ig:  
 267 immunoglobulin, IL-2R: Interleukin-2 receptor, TNF-  $\alpha$ : tumor necrosis factor-alpha.

268

269

270

271 **Pooled estimates of laboratory parameters according to disease**  
272 **severity: Pairwise Meta-analysis**

273 Two-arms meta-analyses were then conducted for three pairwise comparisons; (1)  
274 Severe *versus* mild COVID, (2) ICU admitted patients *versus* the general ward,  
275 and (3) Expired *versus* survivors (**Table 3**).

276 Laboratory parameters of 16 eligible records were utilized to compare between  
277 severe and non-severe patients. Severe cohorts were more likely to have high blood  
278 levels of white blood cells (OR = 1.75, 95%CI = 1.21 - 2.54,  $p = 0.002$ ), neutrophil  
279 count (OR = 2.62, 95%CI = 1.72 - 3.97,  $p < 0.001$ ), prothrombin time (OR = 1.82,  
280 95%CI = 1.00 - 3.33,  $p = 0.047$ ), D-dimer (OR = 3.97, 95%CI = 2.62 - 6.02,  $p$   
281  $< 0.001$ ), fibrinogen (OR = 3.14, 95%CI = 1.64 - 6.00,  $p < 0.001$ ), erythrocyte  
282 sedimentation rate (OR = 1.60, 95%CI = 1.16 - 2.22,  $p < 0.001$ ), procalcitonin (OR  
283 = 4.76, 95%CI = 2.48 - 9.14,  $p < 0.001$ ), IL-6 (OR = 2.10, 95%CI = 1.02 - 4.32,  $p =$   
284 0.043), and IL-10 (OR = 4.93, 95%CI = 2.18 - 11.1,  $p < 0.001$ ). In contrast, patients  
285 with normal lymphocyte count (OR = 0.30, 95%CI = 0.19 - 0.47,  $p < 0.001$ ),  
286 platelet count (OR = 0.56, 95%CI = 0.42 - 0.74,  $p < 0.001$ ), CD4<sup>+</sup> T cells (OR =  
287 0.04, 95%CI = 0.02 - 0.07,  $p < 0.001$ ), and CD8<sup>+</sup> T cells (OR = 0.03, 95%CI = 0.01  
288 - 0.09,  $p < 0.001$ ) were less likely to develop severe form of COVID-19 disease

289 **(Table 3A).**

290 Significant heterogeneity was observed in eight of these parameters, namely WBC  
 291 ( $I^2 = 62.9\%$ ,  $p < 0.001$ ), neutrophil count ( $I^2 = 67.6\%$ ,  $p < 0.001$ ), lymphocyte count  
 292 ( $I^2 = 77.4\%$ ,  $p < 0.001$ ), prothrombin time ( $I^2 = 72\%$ ,  $p = 0.003$ ), D-dimers ( $I^2 =$   
 293  $55.6\%$ ,  $p = 0.021$ ), procalcitonin ( $I^2 = 86.1\%$ ,  $p < 0.001$ ), IL-6 ( $I^2 = 84.4\%$ ,  $p$   
 294  $< 0.001$ ), and IL-10 ( $I^2 = 82.8\%$ ,  $p = 0.003$ ).

295

296 **Table 3. Pooled estimates of two-arms meta-analysis for laboratory**  
 297 **parameters in COVID-19 patients.**

| Laboratory test     | No of studies | Sample size |               | Effect size          |                          |         | Heterogeneity |         |
|---------------------|---------------|-------------|---------------|----------------------|--------------------------|---------|---------------|---------|
|                     |               |             |               | SMD (95% CI)         | OR (95% CI)              | P-value | $I^2$         | P-value |
| <b>(A) Severity</b> |               | <b>Mild</b> | <b>Severe</b> |                      |                          |         |               |         |
| White blood cells   | <b>14</b>     | 1007        | 634           | 0.31 (0.11, 0.52)    | <b>1.75 (1.21, 2.54)</b> | 0.002   | <b>62.9</b>   | <0.001  |
| Neutrophil count    | <b>14</b>     | 959         | 599           | 0.53 (0.3, 0.76)     | <b>2.62 (1.72, 3.97)</b> | <0.001  | <b>67.61</b>  | <0.001  |
| Lymphocyte count    | <b>16</b>     | 680         | 1128          | -0.66 (-0.9, -0.41)  | <b>0.30 (0.19, 0.47)</b> | <0.001  | <b>77.36</b>  | <0.001  |
| Monocyte count      | 5             | 390         | 500           | -0.08 (-0.23, 0.05)  | 0.86 (0.67, 1.12)        | 0.23    | 0.0           | 0.49    |
| Hemoglobin          | 4             | 70          | 200           | -0.22 (-0.51, 0.06)  | 0.67 (0.40, 1.12)        | 0.12    | 0.0           | 0.91    |
| Platelet count      | 7             | 219         | 588           | -0.32 (-0.47, -0.16) | <b>0.56 (0.42, 0.74)</b> | <0.001  | 0.0           | 0.76    |
| Prothrombin time    | 6             | 215         | 521           | 0.33 (0.004, 0.67)   | <b>1.82 (1.00, 3.33)</b> | 0.047   | <b>72.0</b>   | 0.003   |
| APTT                | 5             | 146         | 386           | -0.23 (-0.79, 0.33)  | 0.66 (0.24, 1.82)        | 0.42    | 85.5          | <0.001  |
| D-dimer             | 9             | 301         | 719           | 0.76 (0.53, 0.99)    | <b>3.97 (2.62, 6.02)</b> | <0.001  | <b>55.65</b>  | 0.021   |
| Ferritin            | 2             | 297         | 176           | 1.003 (-0.08, 2.09)  | 6.17 (0.87, 43.9)        | 0.07    | 79.21         | 0.028   |
| Fibrinogen          | 3             | 45          | 144           | 0.63 (0.27, 0.99)    | <b>3.14 (1.64, 6.00)</b> | <0.001  | 0.0           | 0.81    |
| ESR                 | 2             | 302         | 277           | 0.26 (0.08, 0.44)    | <b>1.60 (1.16, 2.22)</b> | 0.004   | 0.0           | 0.43    |
| Procalcitonin       | <b>10</b>     | 565         | 716           | 0.86 (0.5, 1.22)     | <b>4.76 (2.48, 9.14)</b> | <0.001  | <b>86.1</b>   | <0.001  |
| C-reactive protein  | <b>13</b>     | 605         | 928           | 1.02 (0.65, 1.4)     | <b>6.36 (3.22, 12.5)</b> | <0.001  | 88.2          | <0.001  |
| IgA                 | 2             | 355         | 301           | 0.13 (-0.03, 0.29)   | 1.27 (0.95, 1.69)        | 0.11    | 3.398         | 0.30    |
| IgG                 | 2             | 355         | 301           | 0.21 (-0.301, 0.72)  | 1.46 (0.58, 3.69)        | 0.41    | 88.3          | 0.003   |

|                          |   |              |             |                      |                          |        |              |        |
|--------------------------|---|--------------|-------------|----------------------|--------------------------|--------|--------------|--------|
| IgM                      | 2 | 355          | 301         | -2.37 (-6.64, 1.89)  | 0.01 (0.00, 30.6)        | 0.27   | 99.56        | <0.001 |
| Complement 3             | 2 | 355          | 301         | 0.18 (-0.1, 0.47)    | 1.39 (0.83, 2.32)        | 0.20   | 64.70        | 0.09   |
| Complement 4             | 2 | 355          | 301         | 0.13 (-0.16, 0.43)   | 1.27 (0.74, 2.16)        | 0.38   | 66.83        | 0.08   |
| IL-4                     | 2 | 355          | 301         | 1.01 (-0.85, 2.87)   | 6.25 (0.2, 181.1)        | 0.28   | 97.17        | <0.001 |
| IL-6                     | 7 | 85           | 246         | 0.41 (0.014, 0.81)   | <b>2.10 (1.02, 4.32)</b> | 0.043  | <b>84.38</b> | <0.001 |
| IL-10                    | 3 | 371          | 412         | 0.88 (0.43, 1.33)    | <b>4.93 (2.18, 11.1)</b> | <0.001 | <b>82.81</b> | 0.003  |
| TNF- $\alpha$            | 3 | 371          | 412         | 0.6 (-0.17, 1.37)    | 2.97 (0.74, 11.9)        | 0.12   | 94.28        | <0.001 |
| CD4 <sup>+</sup> T cells | 2 | 80           | 145         | -1.87 (-2.39, -1.36) | <b>0.03 (0.01, 0.09)</b> | <0.001 | 29.8         | 0.23   |
| CD8 <sup>+</sup> T cells | 2 | 80           | 145         | -1.8 (-2.12, -1.48)  | <b>0.04 (0.02, 0.07)</b> | <0.001 | 0.0          | 0.71   |
| <b>(B) Admission</b>     |   | <b>Floor</b> | <b>ICU</b>  |                      |                          |        |              |        |
| White blood cells        | 3 | 64           | 149         | 0.85 (0.54, 1.15)    | <b>4.67 (2.70, 8.10)</b> | <0.001 | 0.0          | 0.56   |
| Neutrophil count         | 4 | 73           | 207         | 1.86 (0.59, 3.14)    | <b>29.1 (2.9, 291.8)</b> | 0.004  | <b>93.14</b> | <0.001 |
| Lymphocyte count         | 4 | 73           | 207         | -0.81 (-1.36, -0.27) | <b>0.23 (0.09, 0.62)</b> | 0.003  | <b>68.59</b> | 0.023  |
| Monocyte count           | 3 | 60           | 179         | -0.308 (-1.15, 0.53) | 0.57 (0.13, 2.59)        | 0.47   | 83.77        | 0.002  |
| Hemoglobin               | 2 | 22           | 86          | -1.1 (-1.97, -0.24)  | <b>0.14 (0.03, 0.64)</b> | 0.012  | <b>66.31</b> | 0.08   |
| Platelet count           | 4 | 73           | 207         | -0.06 (-0.33, 0.2)   | 0.90 (0.56, 1.45)        | 0.64   | 0.0          | 0.54   |
| Prothrombin time         | 3 | 64           | 149         | 0.43 (0.09, 0.76)    | <b>2.18 (1.19, 3.99)</b> | 0.012  | 14.28        | 0.31   |
| APTT                     | 3 | 64           | 149         | -0.22 (-0.51, 0.07)  | 0.67 (0.40, 1.13)        | 0.14   | 0.0          | 0.78   |
| D-dimer                  | 3 | 64           | 149         | 0.79 (0.35, 1.24)    | <b>4.19 (1.88, 9.35)</b> | <0.001 | 44.94        | 0.16   |
| <b>(C) Mortality</b>     |   | <b>Alive</b> | <b>Died</b> |                      |                          |        |              |        |
| White blood cells        | 6 | 736          | 392         | 0.91 (0.61, 1.22)    | <b>5.21 (3.00, 9.05)</b> | <0.001 | <b>78.05</b> | <0.001 |
| Neutrophil count         | 3 | 475          | 222         | 1.01 (0.4, 1.63)     | <b>6.25 (2.05, 19.0)</b> | 0.001  | <b>90.9</b>  | <0.001 |
| Lymphocyte count         | 7 | 756          | 424         | -0.85 (-1.28, -0.41) | <b>0.21 (0.10, 0.47)</b> | <0.001 | <b>89.33</b> | <0.001 |
| Monocyte count           | 4 | 483          | 229         | -0.18 (-0.47, 0.1)   | 0.72 (0.43, 1.21)        | 0.21   | 57.48        | 0.070  |
| Hemoglobin               | 5 | 600          | 271         | 0 (-0.15, 0.15)      | 1.00 (0.76, 1.31)        | 0.99   | 4.988        | 0.378  |
| Platelet count           | 6 | 640          | 315         | -0.46 (-0.71, -0.21) | <b>0.43 (0.28, 0.68)</b> | <0.001 | <b>59.52</b> | 0.030  |
| Prothrombin time         | 6 | 640          | 315         | 0.64 (0.25, 1.03)    | <b>3.19 (1.58, 6.47)</b> | 0.001  | 83.0         | <0.001 |
| APTT                     | 4 | 483          | 229         | -0.096 (-0.51, 0.31) | 0.83 (0.40, 1.75)        | 0.646  | 78.23        | 0.003  |
| D-dimer                  | 5 | 620          | 283         | 1.02 (0.85, 1.18)    | <b>6.36 (4.72, 8.58)</b> | <0.001 | 10.63        | 0.34   |
| Ferritin                 | 3 | 338          | 211         | 0.94 (0.26, 1.62)    | <b>5.50 (1.6, 18.83)</b> | 0.006  | <b>91.63</b> | <0.001 |
| ESR                      | 2 | 201          | 157         | 0.33 (0.08, 0.58)    | <b>1.82 (1.16, 2.86)</b> | 0.008  | 20.03        | 0.263  |
| Procalcitonin            | 3 | 580          | 239         | 0.96 (0.43, 1.49)    | <b>5.70 (2.18, 14.9)</b> | <0.001 | <b>81.48</b> | 0.005  |
| C-reactive protein       | 4 | 591          | 331         | 1.08 (0.65, 1.52)    | <b>7.09 (3.23, 15.5)</b> | <0.001 | <b>87.31</b> | <0.001 |
| IL-6                     | 4 | 612          | 276         | 1.45 (1.11, 1.78)    | <b>13.87 (7.6, 25.4)</b> | <0.001 | <b>75.44</b> | 0.007  |
| CD4 <sup>+</sup> T cells | 2 | 314          | 109         | -0.67 (-1.01, -0.33) | <b>0.30 (0.16, 0.55)</b> | <0.001 | 44.57        | 0.17   |
| CD8 <sup>+</sup> T cells | 2 | 314          | 109         | -0.832 (-1.1, -0.59) | <b>0.22 (0.15, 0.34)</b> | <0.001 | 0.0          | 0.423  |

298 Continuous Random-Effects model, SMD: Standardized mean difference, OR 95% CI: Odds ratio 95%  
299 confidence interval,  $I^2$ : the ratio of true heterogeneity to total observed variation. APTT: Activated  
300 partial thromboplastin time, ESR: Erythrocyte sedimentation rate. Ig: immunoglobulin, IL: Interleukin,  
301 TNF- $\alpha$ : tumor necrosis factor-alpha.

## 302 **Pooled estimates of laboratory parameters according to ICU** 303 **admission: Pairwise Meta-analysis**

304 A total of 4 eligible articles were recognized to include laboratory features of ICU  
305 and floor patients. Our data revealed having elevated levels of WBCs (OR = 5.21,  
306 95%CI = 3.0 – 9.05,  $p < 0.001$ ), neutrophils (OR = 6.25, 95%CI = 2.05 – 19.0,  $p =$   
307 0.001), D-dimer (OR = 4.19, 95%CI = 1.88 - 9.35,  $p < 0.001$ ), and prolonged  
308 prothrombin time (OR = 2.18, 95%CI = 1.19 - 3.99,  $p = 0.012$ ) were associated  
309 with increased odds of ICU admission, while normal lymphocyte count (OR =  
310 0.23, 95%CI = 0.09 - 0.62,  $p = 0.003$ ) and hemoglobin (OR = 0.14, 95%CI = 0.03 -  
311 0.64,  $p = 0.012$ ) conferred lower risk of ICU admission (**Table 3B**).

312 Remarkable heterogeneity was obvious in studies of neutrophil count ( $I^2 = 93.1\%$ ,  
313  $p < 0.001$ ), lymphocyte count ( $I^2 = 68.5\%$ ,  $p = 0.023$ ), and hemoglobin ( $I^2 = 66.3\%$ ,  
314  $p = 0.08$ ). These parameters were enclosed in two to four studies; therefore, further  
315 tracing for the source of heterogeneity was not applicable.

## 316 **Pooled estimates of laboratory parameters according to mortality:**

## 317 **Pairwise Meta-analysis**

318 Of the included articles, 7 studies contained separate results for laboratory testing  
319 in survival *versus* expired patients. As depicted in **Table 3C**, our data revealed  
320 increased odds of having elevated levels of WBC (OR = 5.21, 95%CI = 3.0 – 9.05,  
321  $p < 0.001$ ), neutrophils (OR = 6.25, 95%CI = 2.05 – 19.0,  $p = 0.001$ ), prothrombin  
322 time (OR = 3.19, 95%CI = 1.58 – 6.47,  $p = 0.001$ ), D-dimer (OR = 6.36, 95%CI =  
323 4.72 - 8.58,  $p < 0.001$ ), ferritin (OR = 5.50, 95%CI = 1.6 - 18.8,  $p = 0.006$ ), ESR  
324 (OR = 1.82, 95%CI = 1.16 - 2.86,  $p = 0.008$ ), procalcitonin (OR = 5.70, 95%CI =  
325 2.18 - 14.9,  $p < 0.001$ ), CRP (OR = 7.09, 95%CI = 3.23 - 15.5,  $p < 0.001$ ), and IL-6  
326 (OR = 13.87, 95%CI = 7.6 - 25.4,  $p < 0.001$ ) in expired cases. However, patients  
327 with normal lymphocyte count (0.21 (0.10, 0.47,  $p < 0.001$ ), platelet count (0.43  
328 (0.28, 0.68,  $p < 0.001$ ), CD4<sup>+</sup> T cells (OR = 0.30 (0.16, 0.55,  $p < 0.001$ ), and CD8<sup>+</sup>  
329 T cells (OR = 0.22 (0.15, 0.34,  $p < 0.001$ ) had higher chance of survival (**Table**  
330 **3C**).

331 Considerable heterogeneity was also noted in some of these parameters, namely  
332 WBC ( $I^2 = 78.0\%$ ,  $p < 0.001$ ), neutrophilic count ( $I^2 = 90.9\%$ ,  $p < 0.001$ ),  
333 lymphocyte count ( $I^2 = 89.3\%$ ,  $p < 0.001$ ), platelet count ( $I^2 = 59.5\%$ ,  $p = 0.030$ ),  
334 ferritin ( $I^2 = 91.6\%$ ,  $p < 0.001$ ), procalcitonin ( $I^2 = 81.5\%$ ,  $p = 0.005$ ), CRP ( $I^2 =$   
335  $87.3\%$ ,  $p < 0.001$ ), and IL-6 ( $I^2 = 75.4\%$ ,  $p = 0.007$ ). Given the small number of  
336 enrolled studies with discriminated data on patients who survived or died, we

337 failed to identify the source of heterogeneity.

### 338 **Subgroup and sensitivity analysis**

339 For the studies which included a comparison between mild and severe patients,  
340 subgroup and sensitivity analyses were performed for five laboratory markers  
341 (WBC, neutrophil count, lymphocyte count, procalcitonin, and CRP). First, to  
342 identify how each study affects the overall estimate of the rest of the studies, we  
343 performed leave-one-out sensitivity analyses. Results did not contribute to give  
344 explanations to heterogeneity. In contrast, subgroup analysis revealed homogeneity  
345 with certain categorizations. For WBCs lab results, heterogeneity was resolved on  
346 stratification by the origin of study population [Wuhan population:  $I^2 = 73.4\%$ ,  $p =$   
347  $0.002$ , other cities:  $I^2 = 0\%$ ,  $p = 0.53$ ] and month of publication [April:  $I^2 = 74.5\%$ ,  
348  $p = 0.001$ , February/March:  $I^2 = 47.5\%$ ,  $p = 0.06$ ]. Regarding neutrophilic count,  
349 the variance in the results resolved in articles with large sample size  $>50$  patients  
350 ( $I^2 = 46.2\%$ ,  $p = 0.06$ ). Moreover, the degree of dissimilarities of procalcitonin  
351 results found in different studies was ameliorated in April publications ( $I^2 = 41.5\%$ ,  
352  $p = 0.16$ ) and in those with low sample size ( $I^2 = 0\%$ ,  $p = 0.80$ ). Similarly,  
353 homogeneity was generated in CRP results in articles with low sample size ( $I^2 =$   
354  $0\%$ ,  $p = 0.58$ ) (**Table 4**).

### 355 **Meta-regression analysis**

356 Considering the number of the included studies with severity, ICU admission, and  
357 mortality data was rather small, we performed meta-regression analyses for only  
358 five parameters (mentioned above) in studies comparing mild and severe disease  
359 **(Table 4)**.



360  
361

**Table 4. Tracing the source of heterogeneity of laboratory markers in studies comparing mild and severe COVID-19 patients**

| Lab test                 | Feature            | Categories | Count of studies | Pooled estimates |        |        |         | Heterogeneity  |         | Meta-regression  |       |       |         |
|--------------------------|--------------------|------------|------------------|------------------|--------|--------|---------|----------------|---------|------------------|-------|-------|---------|
|                          |                    |            |                  | SMD              | LL     | UL     | P-value | I <sup>2</sup> | P-value | Coefficient      | LL    | UL    | P-value |
| <b>White blood cells</b> | Overall            |            | 14               | 0.317            | 0.113  | 0.52   | 0.002   | 62.90%         | 0.001   |                  |       |       |         |
|                          | Origin of patients | Others     | 8                | 0.113            | -0.083 | 0.308  | 0.26    | 0%             | 0.53    | <i>Reference</i> |       |       |         |
|                          |                    | Wuhan      | 6                | 0.490            | 0.198  | 0.783  | 0.00    | 73.40%         | 0.002   | 0.31             | 0.03  | 0.58  | 0.029   |
|                          | Sample size        | ≤50        | 5                | 0.164            | -0.553 | 0.881  | 0.65    | 71.30%         | 0.007   | <i>Reference</i> |       |       |         |
|                          |                    | >50        | 9                | 0.387            | 0.208  | 0.566  | <0.001  | 52.60%         | 0.031   | 0.30             | -0.10 | 0.72  | 0.14    |
|                          | Publication month  | Feb/Mar    | 8                | 0.251            | 0.039  | 0.464  | 0.021   | 47.50%         | 0.06    | <i>Reference</i> |       |       |         |
| April                    |                    | 6          | 0.445            | 0.005            | 0.884  | 0.047  | 74.50%  | 0.001          | 0.11    | -0.16            | 0.38  | 0.43  |         |
| <b>Neutrophils</b>       | Overall            |            | 14               | 0.534            | 0.306  | 0.762  | <0.001  | 67.62%         | <0.001  |                  |       |       |         |
|                          | Origin of patients | Others     | 8                | 0.439            | 0.139  | 0.740  | 0.004   | 50.88%         | 0.047   | <i>Reference</i> |       |       |         |
|                          |                    | Wuhan      | 6                | 0.632            | 0.280  | 0.985  | <0.001  | 78.29%         | <0.001  | 0.045            | -0.21 | 0.30  | 0.20    |
|                          | Sample size        | ≤50        | 5                | 0.286            | -0.503 | 1.076  | 0.47    | 75.94%         | 0.002   | <i>Reference</i> |       |       |         |
|                          |                    | >50        | 9                | 0.65             | 0.472  | 0.828  | <0.001  | 46.2%          | 0.06    | 0.606            | 0.20  | 1.01  | 0.003   |
|                          | Publication month  | Feb/Mar    | 8                | 0.428            | 0.181  | 0.675  | <0.001  | 54.4%          | 0.032   | <i>Reference</i> |       |       |         |
| April                    |                    | 6          | 0.709            | 0.273            | 1.44   | 0.001  | 73.19%  | 0.002          | 0.312   | 0.06             | 0.55  | 0.014 |         |
| <b>Lymphocytes</b>       | Overall            |            | 16               | -0.663           | -0.909 | -0.417 | <0.001  | 77.36%         | <0.001  |                  |       |       |         |
|                          | Origin of patients | Others     | 9                | -0.626           | -0.962 | -0.291 | <0.001  | 66.51%         | 0.002   | <i>Reference</i> |       |       |         |
|                          |                    | Wuhan      | 7                | -0.710           | 1.097  | -0.323 | <0.001  | 85.72%         | <0.001  | 0.092            | -0.31 | 0.49  | 0.64    |
|                          | Sample size        | ≤50        | 5                | -0.506           | -1.169 | 0.156  | 0.13    | 66.1%          | 0.019   | <i>Reference</i> |       |       |         |
|                          |                    | >50        | 11               | -0.714           | -0.983 | -0.444 | <0.001  | 80.98%         | <0.001  | -0.342           | -0.85 | 0.169 | 0.18    |
|                          | Publication month  | Feb/Mar    | 9                | -0.452           | -0.712 | -0.192 | <0.001  | 66.65%         | 0.002   | <i>Reference</i> |       |       |         |
| April                    |                    | 7          | -0.979           | -1.354           | -0.604 | <0.001 | 70.53%  | 0.002          | -0.572  | -0.97            | -0.17 | 0.006 |         |
| <b>Procalcitonin</b>     | Overall            |            | 10               | 0.868            | 0.508  | 1.228  | <0.001  | 88.16%         | <0.001  |                  |       |       |         |

|                   |                           |                    |        |       |       |        |        |        |        |                  |                  |       |      |      |
|-------------------|---------------------------|--------------------|--------|-------|-------|--------|--------|--------|--------|------------------|------------------|-------|------|------|
|                   | Origin of patients        | Others             | 5      | 1.038 | 0.370 | 1.706  | <0.001 | 86.16% | <0.001 | <i>Reference</i> |                  |       |      |      |
|                   |                           | Wuhan              | 5      | 0.686 | 0.331 | 1.041  | <0.001 | 75.38% | 0.003  | -0.318           | -0.97            | 0.33  | 0.34 |      |
|                   | Sample size               | ≤50                | 3      | 0.768 | 0.334 | 1.203  | <0.001 | 0%     | 0.80   | <i>Reference</i> |                  |       |      |      |
|                   |                           | >50                | 7      | 0.903 | 0.459 | 1.348  | <0.001 | 88.62% | <0.001 | 0.054            | -0.72            | 0.83  | 0.89 |      |
|                   | Publication month         | Feb/Mar            | 6      | 0.956 | 0.404 | 1.509  | <0.001 | 91.51% | <0.001 | <i>Reference</i> |                  |       |      |      |
|                   |                           | April              | 4      | 0.757 | 0.409 | 1.105  | <0.001 | 41.54% | 0.16   | -0.096           | -0.80            | 0.61  | 0.78 |      |
|                   | <b>C-reactive protein</b> | Overall            |        | 13    | 1.027 | 0.65   | 1.40   | <0.001 | 88.2%  | <0.001           |                  |       |      |      |
|                   |                           | Origin of patients | Others | 8     | 1.24  | 0.65   | 1.83   | <0.001 | 87.8%  | <0.001           | <i>Reference</i> |       |      |      |
|                   |                           |                    | Wuhan  | 5     | 0.389 | 0.30   | 1.07   | <0.001 | 80.7%  | <0.001           | -0.58            | -1.27 | 0.10 | 0.09 |
|                   |                           | Sample size        | ≤50    | 3     | 0.831 | 0.341  | 1.322  | <0.001 | 0%     | 0.58             | <i>Reference</i> |       |      |      |
| >50               |                           |                    | 10     | 1.08  | 0.651 | 1.512  | <0.001 | 82.3%  | <0.001 | 0.37             | -0.55            | 1.29  | 0.42 |      |
| Publication month |                           | Feb/Mar            | 8      | 1.014 | 0.502 | 1.525  | <0.001 | 88.23% | <0.001 | <i>Reference</i> |                  |       |      |      |
|                   | April                     | 5                  | 1.07   | 0.548 | 1.600 | <0.001 | 75.1%  | 0.003  | 0.13   | -0.59            | 0.86             | 0.71  |      |      |

362 SMD: Standardized mean difference, LL: lower limit, UL: upper limit,  $I^2$ : the ratio of true heterogeneity to total observed variation.

363 Significant values indicate significance at  $P < 0.05$ .

364 For WBCs, higher difference between mild and severe cohorts was noted in  
365 Wuhan studies than other population (coefficient = 0.31, 95%CI = 0.03, 0.58,  $p =$   
366 0.029). Moreover, articles with larger sample size exhibited a wider variation of  
367 neutrophilic count between severe and non-severe cases (coefficient = 0.60, 95%CI  
368 = 0.20, 1.01,  $p = 0.003$ ). For the same marker, later studies published in April also  
369 showed higher difference compared to those published in February and March  
370 (coefficient = 0.31, 95%CI = 0.06, 0.55,  $p = 0.014$ ). In contrast, more reduction of  
371 lymphocytes was observed in April articles than earlier ones (coefficient = -0.57,  
372 95%CI = -0.97, -0.17,  $p = 0.006$ ).

### 373 **Publication bias**

374 Publication bias was performed to the same five parameters with study count  $\geq 10$   
375 (**Fig. S1**). Visual inspection of the funnel plots suggested symmetrical distribution  
376 for all laboratory parameters tested. The Egger test ( $p > 0.1$ ) confirmed that there  
377 was no substantial evidence of publication bias; Egger's regression  $p$  values were  
378 0.44, 0.50, 0.68, 0.56, and 0.22 for WBC, neutrophil count, lymphocyte count,  
379 procalcitonin, and CRP, respectively.

### 380 **Decision tree and Receiver Operating Characteristic (ROC) curve**

381 To identify predictors for severity, decision tree analysis was applied using  
382 multiple laboratory results. High performance of classification was found with the

383 usage of a single parameter; neutrophilic count identified severe patients with  
384 100% sensitivity and 81% specificity at a cut-off value of >3.74 identified by the  
385 specified decision tree model. Further analysis of the area under the curve of input  
386 data is shown in **Table 5**.

387 **Table 5. Receiver Operating Characteristics results**

| Lab test      | AUC          | Threshold | Sensitivity | Specificity | P-value          |
|---------------|--------------|-----------|-------------|-------------|------------------|
| WBC           | 0.801 ± 0.09 | 5.47      | 85.7        | 85.7        | <b>0.007</b>     |
| Neutrophil    | 0.831 ± 0.09 | 3.74      | 78.5        | 100         | <b>0.003</b>     |
| Lymphocyte    | 0.867 ± 0.06 | 0.98      | 81.2        | 87.5        | <b>&lt;0.001</b> |
| Platelets     | 0.836 ± 0.11 | 177.6     | 71.4        | 71.4        | <b>0.035</b>     |
| PT            | 0.583 ± 0.17 | 12.9      | 50.0        | 83.3        | 0.63             |
| Procalcitonin | 0.845 ± 0.09 | 0.06      | 80.0        | 90.0        | <b>0.007</b>     |
| D-dimer       | 0.876 ± 0.08 | 0.48      | 88.9        | 77.8        | <b>0.007</b>     |
| CRP           | 0.875 ± 0.08 | 38.2      | 84.6        | 92.3        | <b>0.001</b>     |
| IL-6          | 0.632 ± 1.6  | 22.9      | 71.4        | 71.4        | 0.40             |

388 AUC: area under the curve, WBC: white blood cells, PT: prothrombin time, CRP: C-reactive  
389 protein, IL-6: interleukin 6. Bold values indicate significance at  $P < 0.05$ .

390

### 391 **Trial sequential analysis**

392 As elaborated by the decision tree algorithm for the role of neutrophilic count on  
393 decision-making to discriminate between COVID-19 patients with a mild and  
394 severe presentation, TSA was employed on that particular laboratory parameter to

395 test for the presence of sufficient studies from which results were drawn. The  
396 sample size of studies containing neutrophilic count information and classifying  
397 cohorts into mild and severe COVID-19 infection accounted for a total of 1,558  
398 subjects. TSA illustrated crossing of the monitoring boundary by the cumulative Z-  
399 curve before reaching the required sample size, suggesting that the cumulative  
400 proof was acceptable, and no additional future studies are needed to authenticate  
401 the significances (**Fig 2**).

402  
403 **Fig 2 Trial sequential analysis.** Trial sequential analysis (TSA) for the neutrophil  
404 count. The obtained sample size of the neutrophil count was 1558 subjects and the  
405 cumulative Z-curve crossed the monitoring boundary before reaching the required  
406 sample size, suggesting that the cumulative proof was reliable, and no additional  
407 trials are required to achieve the significances.

## 408 **Discussion**

409 During the last few months, the prevalence of COVID-19 infection was increased  
410 daily among different countries overall in the world. Thus, the need to assess the  
411 disease severity and mortality are required to limit the pervasiveness of this  
412 pandemic [21]. A diverse of abnormal laboratory parameters including  
413 hematological, inflammatory as well as immunological markers thought to be

414 raised throughout COVID-19 outbreak [2, 22]. In this comprehensive meta-  
415 analysis, our team attempted to interpret the distinct questions raised about the  
416 various spectrum of laboratory parameters associated with the severity and  
417 mortality of COVID-19. At the beginning of this workflow, our team investigated  
418 different hematological, inflammatory, and immunological variables of 6320  
419 patients diagnosed with COVID-19. Our findings using random-effect models  
420 revealed increased levels of WBCs and neutrophil counts that were significantly  
421 associated with higher odds ratio among severe, ICU admission and Expired  
422 patients with COVID-19. On the contrary, the levels of lymphocyte and platelet  
423 counts were lowered among severe and expired patients with COVID-19. Also, we  
424 observed depletion in quantities of CD4<sup>+</sup> T cells and CD8<sup>+</sup> T cells among severe  
425 and mortality patients.

426 Nevertheless, in patients with the COVID-19 outbreak, the WBC count can vary  
427 [23]. Other reports indicated that leukopenia, leukocytosis, and lymphopenia have  
428 been reported, although lymphopenia appears most common [24, 25]. Another  
429 study supported that lymphopenia is an effective and reliable indicator of the  
430 severity and hospitalization in COVID-19 patients [26]. The additional report  
431 suggested that COVID-19 illness might be implicated with CD4<sup>+</sup> and CD8<sup>+</sup> T cells  
432 depletion through acting on lymphocytes, especially T lymphocytes [27]. A recent  
433 meta-analysis study discovered that the severity among COVID-19 patients might

434 correlate with higher levels of WBCs count and lower levels of lymphocyte, CD4<sup>+</sup>  
435 T cells, and CD8<sup>+</sup> T cells counts [22]. In this respect, we could speculate that the  
436 depletion in the number of lymphocytes count is directly proportional with the  
437 severity of COVID-19 infection and the high survival rate of the disease is  
438 associated with the ability to renovate lymphocyte cells, particularly T  
439 lymphocytes which are crucial for destroying the infected viral particles [28].  
440 During disease severity, remarkable thrombocytopenia was observed and  
441 confirmed by Lippi and his colleagues that revealed a reduction of platelet count  
442 among severe and died patients with COVID-19 supporting that thrombocytopenia  
443 could consider as an exacerbating indicator during the progression of the disease  
444 [29]. Therefore, our findings could support Shi et al. conclusion that high WBC  
445 count with lymphopenia could be considered as a differential diagnostic criterion  
446 for COVID-19 [30].

447 Considering coagulation profile, our team observed a prolonged in most  
448 coagulation markers among severe, ICU and expired patients, especially  
449 prothrombin time, fibrinogen, D-dimer, but with normal proportions of activated  
450 partial thromboplastin time (APTT) that could focus the light on the pathogenesis  
451 of COVID-19 infection through interfering with extrinsic coagulation pathway. A  
452 recently published report concluded similar findings in the form of observation of  
453 higher levels prothrombin time, D-dimer along fibrin degradation products among

454 non-survival compared with survival patients [31].

455 Numerous studies illustrated the pathogenesis action of COVID-19 with the  
456 induction of cytokine storm throughout the progressive phase of the infection [22,  
457 32, 33]. The generation of cytokine storm within COVID-19 patients required  
458 increased levels of IFN- $\gamma$  and IL-1 $\beta$  that could stimulate the cellular response of T  
459 helper type 1 (Th1) which has a crucial function in the acceleration of specific  
460 immunity against COVID-19 outbreak [32]. Due to the elevated levels of IL-2R  
461 and IL-6 accompanied by the advancement of COVID-19, several cytokines  
462 secreted by T helper type 2 (Th2) cells that could neutralize the inflammatory  
463 responses including IL-4 and IL-10 [22, 32]. Our findings revealed a significantly  
464 associated with elevated levels of anti-inflammatory cytokines involving IL-6 and  
465 IL-10 among severe and expired patients with COVID-19. A recent study indicated  
466 a similar assumption with these findings and identified elevated levels of IL-6 and  
467 IL-10 among non-survived compared with survived patients [9]. Another  
468 confirmation of this conclusion is confirmed by a newly published meta-analysis  
469 report that indicated an exaggerated elevation of IL-6 and IL-10 throughout the  
470 severe level of COVID-19 infection [22].

471 Concerning the inflammatory markers associated with the COVID-19 pandemic,  
472 this comprehensive meta-analysis study observed higher concentrations of C-  
473 reactive protein (CRP) and procalcitonin besides elevated erythrocyte



474 sedimentation rate (ESR) levels among severe and expired patients with COVID-  
475 19. Recently, Henry et al. established a meta-analysis survey and corroborated this  
476 finding with a higher significance of CRP and procalcitonin levels [22]. Other  
477 recent reports identified higher levels of CRP among severe patients with COVID-  
478 19 infection [26]. An additional meta-analysis survey established based on four  
479 recent articles indicated prolonged levels of procalcitonin among severe patients  
480 with COVID-19 [34]. In this respect, we might speculate the potential role of  
481 procalcitonin as a prognostic biomarker during the severe status of COVID-19.  
482 Finally, our team revealed increased levels of serum ferritin among non-survived  
483 patients compared with survived patients, and this significant outcome was  
484 observed in another meta-analysis study among severe and non-survival patients  
485 with COVID-19 infection [22].

486 This comprehensive meta-analysis confronted several limitations that raised  
487 throughout the processing of the outcomes. First, the insufficient laboratory data  
488 concerning the interest of design causing the increasing bias among different  
489 covariates. Second, the variation in the characteristics among different articles  
490 concerning the severity and survival of COVID-19. Third, the small sample sizes  
491 of some studies besides most of the concerned articles were established within  
492 China, especially Wuhan. Finally, there was an observed publication bias and  
493 heterogeneity in this comprehensive meta-analysis.

## 494 **Conclusion**

495 In conclusion, several laboratory parameters could associate with the severity and  
496 mortality of COVID-19 infection and should be screened and measured  
497 continuously during the progression of this pandemic. These parameters included  
498 WBCs count, lymphocytes, platelet count, prothrombin time, D-dimer, and  
499 fibrinogen. Also, various interleukins could serve as anti-inflammatory markers  
500 such as IL-6, and IL-10 and should be evaluated. The estimation of other  
501 inflammatory biomarkers like CRP and procalcitonin could be helpful in the  
502 monitor the severity of the disease.

## 503 **Acknowledgments**

504 We thank all authors who provided published information for our meta-analysis.

## 505 **Funding** None

## 506 **References**

- 507 1. Huang C, Wang Y, Li X, Ren L, Zhao J, Hu Y, et al. Clinical features of  
508 patients infected with 2019 novel coronavirus in Wuhan, China. *Lancet*.  
509 2020; 395(10223): 497-506.
- 510 2. Rodriguez-Morales AJ, Cardona-Ospina JA, Gutiérrez-Ocampo E,  
511 Villamizar-Peña R, Holguin-Rivera Y, Escalera-Antezana JP, et al. Clinical,  
512 laboratory and imaging features of COVID-19: A systematic review and  
513 meta-analysis. *Travel medicine and infectious disease*. 2020; 101623.
- 514 3. Al-Tawfiq JA, Gautret P. Asymptomatic Middle East Respiratory Syndrome

- 515           Coronavirus (MERS-CoV) infection: Extent and implications for infection  
516           control: A systematic review. *Travel Med Infect Dis*, 2019; 27:27-32.
- 517 4.       Ksiazek TG, Erdman D, Goldsmith CS, Zaki SR, Peret T, Emery S, et al. A  
518       novel coronavirus associated with severe acute respiratory syndrome. *New*  
519       *England journal of medicine*. 2003; 348(20):1953-66.
- 520 5.       Rodriguez-Morales AJ, Bonilla-Aldana DK, Balbin-Ramon GJ, Rabaan AA,  
521       Sah R, Paniz-Mondolfi A, et al. History is repeating itself: Probable zoonotic  
522       spillover as the cause of the 2019 novel Coronavirus Epidemic. *Infez Med*.  
523       2020; 28:3-5.
- 524 6.       Chen N, Zhou M, Dong X, Qu J, Gong F, Han Y, et al. Epidemiological and  
525       clinical characteristics of 99 cases of 2019 novel coronavirus pneumonia in  
526       Wuhan, China: a descriptive study. *The Lancet*. 2020; 395:507-13.
- 527 7.       Yin Y, Wunderink RG. MERS, SARS and other coronaviruses as causes of  
528       pneumonia. *Respirology*. 2018; 23:130-137.
- 529 8.       Lechien JR, Chiesa-Estomba CM, Place S, Van Laethem Y, Cabaraux P,  
530       Mat Q, et al. Clinical and Epidemiological Characteristics of 1,420 European  
531       Patients with mild to moderate Coronavirus Disease 2019. *Journal of*  
532       *Internal Medicine*. 2020.
- 533 9.       Chen T, Wu D, Chen H, Yan W, Yang D, Chen G, et al. Clinical  
534       characteristics of 113 deceased patients with coronavirus disease 2019:  
535       retrospective study. *Bmj*. 2020; 368.
- 536 10.      Udugama B, Kadhiresan P, Kozlowski HN, Malekjahani A, Osborne M, Li  
537      VY, et al. Diagnosing COVID-19: the disease and tools for detection. *ACS*  
538      *nano*. 2020.
- 539 11.      McInnes MD, Moher D, Thombs BD, McGrath TA, Bossuyt PM, Clifford  
540      T, et al. Preferred reporting items for a systematic review and meta-analysis  
541      of diagnostic test accuracy studies: the PRISMA-DTA statement. *Jama*.

- 542 2018; 319:388-396.
- 543 12. Kapadia MZ, Park CK, Beyene J, Giglia L, Maxwell C, McDonald SD.  
544 Weight loss instead of weight gain within the guidelines in obese women  
545 during pregnancy: a systematic review and meta-analyses of maternal and  
546 infant outcomes. *PloS one*. 2015; 10(7).
- 547 13. Stang A. Critical evaluation of the Newcastle-Ottawa scale for the  
548 assessment of the quality of nonrandomized studies in meta-analyses.  
549 *European Journal of Epidemiology*. 2010; 25: 603-605.
- 550 14. Wallace BC, Dahabreh IJ, Trikalinos TA, Lau J, Trow P, Schmid CH.  
551 Closing the gap between methodologists and end-users: R as a  
552 computational back-end. *J Stat Softw*. 2012; 49:1-5.
- 553 15. Pierce CA. Software Review: Borenstein, M, Hedges LV, Higgins JPT and  
554 Rothstein HR (2006). *Comprehensive Meta-Analysis (Version 2.2.*  
555 *027)[Computer software]*. Englewood, NJ: Biostat. *Organizational Research*  
556 *Methods*. 2008; 11:188-191.
- 557 16. DerSimonian R, Laird N. Meta-analysis in clinical trials. *Control Clin Trials*.  
558 1986; 7:177-188.
- 559 17. Andreano A, Rebora P, Valsecchi MG. Measures of single arm outcome in  
560 meta-analyses of rare events in the presence of competing risks. *Biometrical*  
561 *Journal*. 2015; 57: 649-660.
- 562 18. Elshazli RM, Toraih EA, Elgaml A, Kandil E, Fawzy MS. Genetic  
563 polymorphisms of TP53 (rs1042522) and MDM2 (rs2279744) and colorectal  
564 cancer risk: An updated meta-analysis based on 59 case-control studies.  
565 *Gene*. 2020;144391.
- 566 19. Lin L, Chu H. Quantifying publication bias in meta-analysis. *Biometrics*.  
567 2018; 74:785-794.
- 568 20. Duval S, Tweedie R, Nonparametric A. “Trim and Fill” Method of

- 569 Accounting for Publication Bias in Meta-Analysis. *Journal of the American*  
570 *Statistical Association*. 2000; 95:89-98.
- 571 21. Emami A, Javanmardi F, Pirbonyeh N, Akbari A. Prevalence of Underlying  
572 Diseases in Hospitalized Patients with COVID-19: a Systematic Review and  
573 Meta-Analysis. *Arch Acad Emerg Med*. 2020; 8:e35.
- 574 22. Henry BM, De Oliveira MH, Benoit S, Plebani M, Lippi G. Hematologic,  
575 biochemical and immune biomarker abnormalities associated with severe  
576 illness and mortality in coronavirus disease 2019 (COVID-19): a meta-  
577 analysis. *Clin Chem Lab Med*. 2020.
- 578 23. Di Gennaro F, Pizzol D, Marotta C, Antunes M, Racalbuto V, Veronese N,  
579 et al. Coronavirus Diseases (COVID-19) Current Status and Future  
580 Perspectives: A Narrative Review. *Int J Environ Res Public Health*. 2020;  
581 17.
- 582 24. Lippi G, Simundic AM, Plebani M. Potential preanalytical and analytical  
583 vulnerabilities in the laboratory diagnosis of coronavirus disease 2019  
584 (COVID-19). *Clin Chem Lab Med*. 2020.
- 585 25. Lagier JC, Colson P, Dupont HT, Salomon J, Doudier B, Aubry C., et al.,  
586 Testing the repatriated for SARS-Cov2: Should laboratory-based quarantine  
587 replace traditional quarantine? *Travel Med Infect Dis*. 2020; 101624.
- 588 26. Tan C, Huang Y, Shi F, Tan K, Ma Q, Chen Y, et al. C-reactive protein  
589 correlates with computed tomographic findings and predicts severe COVID-  
590 19 early. *J Med Virol*. 2020.
- 591 27. He R, Lu Z, Zhang L, Fan T, Xiong R, Shen X, et al. The clinical course and  
592 its correlated immune status in COVID-19 pneumonia. *Journal of Clinical*  
593 *Virology*. 2020; 104361.
- 594 28. Henry BM. COVID-19, ECMO, and lymphopenia: a word of caution.  
595 *Lancet Respir Med*. 2020; 8: e24.

- 596 29. Lippi G, Plebani M, Henry BM. Thrombocytopenia is associated with severe  
597 coronavirus disease 2019 (COVID-19) infections: A meta-analysis. *Clinica*  
598 *Chimica Acta*. 2020; 506:145-148.
- 599 30. Shi Y, Wang Y, Shao C, Huang J, Gan J, Huang X, et al. COVID-19  
600 infection: the perspectives on immune responses. *Cell Death Differ*. 2020;  
601 27: 1451-1454.
- 602 31. Tang N, Li D, Wang X, Sun Z. Abnormal coagulation parameters are  
603 associated with poor prognosis in patients with novel coronavirus  
604 pneumonia. *Journal of Thrombosis and Haemostasis*. 2020; 18:844-847.
- 605 32. Ye Q, Wang B, Mao J. The pathogenesis and treatment of the 'Cytokine  
606 Storm' in COVID-19. *J Infect*. 2020.
- 607 33. Zhao M. Cytokine storm and immunomodulatory therapy in COVID-19:  
608 Role of chloroquine and anti-IL-6 monoclonal antibodies. *Int J Antimicrob*  
609 *Agents*. 2020; 105982.
- 610 34. Lippi G, Plebani M. Procalcitonin in patients with severe coronavirus  
611 disease 2019 (COVID-19): A meta-analysis. *Clin Chim Acta*. 2020;  
612 505:190-191.
- 613 35. Zhu Z, Cai T, Fan L, Lou K, Hua X, Huang Z., et al. Clinical value of  
614 immune-inflammatory parameters to assess the severity of coronavirus  
615 disease 2019. *International Journal of Infectious Diseases*. 2020.
- 616 36. Liu X, Li Z, Liu S, Sun J, Chen Z, Jiang M, et al. Potential therapeutic  
617 effects of dipyridamole in the severely ill patients with COVID-19. *Acta*  
618 *Pharm Sin B*. 2020.
- 619 37. Chen X, Zhao B, Qu Y, Chen Y, Xiong J, Feng Y, et al. Detectable serum  
620 SARS-CoV-2 viral load (RNAemia) is closely correlated with drastically  
621 elevated interleukin 6 (IL-6) level in critically ill COVID-19 patients. *Clin*  
622 *Infect Dis*. 2020.

- 623 38. Chen G, Wu D, Guo W, Cao Y, Huang D, Wang H, et al. Clinical and  
624 immunological features of severe and moderate coronavirus disease 2019. *J*  
625 *Clin Invest.* 2020.
- 626 39. Zhang G, Hu C, Luo L, Fang F, Chen Y, Li J, et al. Clinical features and  
627 short-term outcomes of 221 patients with COVID-19 in Wuhan, China. *J*  
628 *Clin Virol.* 2020; 127:104364.
- 629 40. Lei S, Jiang F, Su W, Chen C, Chen J, Mei W, et al. Clinical characteristics  
630 and outcomes of patients undergoing surgeries during the incubation period  
631 of COVID-19 infection. *EClinicalMedicine.* 2020; 100331.
- 632 41. Wang L, He W, Yu X, Hu D, Bao M, Liu H, et al. Coronavirus disease 2019  
633 in elderly patients: Characteristics and prognostic factors based on 4-week  
634 follow-up. *J Infect.* 2020.
- 635 42. Guo T, Fan Y, Chen M, Wu X, Zhang L, He T, et al., Cardiovascular  
636 Implications of Fatal Outcomes of Patients With Coronavirus Disease 2019  
637 (COVID-19). *JAMA Cardiol.* 2020.
- 638 43. Zheng C, Wang J, Guo H, Lu Z, Ma Y, Zhu Y, et al. Risk-adapted  
639 Treatment Strategy For COVID-19 Patients. *Int J Infect Dis.* 2020; 94: 74-  
640 77.
- 641 44. Tang X, Du R, Wang R, Cao T, Guan L, Yang C et al. Comparison of  
642 Hospitalized Patients With ARDS Caused by COVID-19 and H1N1. *Chest.*  
643 2020.
- 644 45. Shi S, Qin M, Shen B, Cai Y, Liu T, Yang F et al. Association of Cardiac  
645 Injury With Mortality in Hospitalized Patients With COVID-19 in Wuhan,  
646 China. *JAMA Cardiol.* 2020.
- 647 46. To KK, Tsang OT, Leung WS, Tam AR, Wu TC, Lung DC, et al. Temporal  
648 profiles of viral load in posterior oropharyngeal saliva samples and serum  
649 antibody responses during infection by SARS-CoV-2: an observational

- 650 cohort study. *Lancet Infect Dis.* 2020.
- 651 47. Zhou Z, Guo D, Li C, Fang Z, Chen L, Yang R, et al. Coronavirus disease  
652 2019: initial chest CT findings. *Eur Radiol.* 2020.
- 653 48. Chen Z, Fan H, Cai J, Li Y, Wu B, Hou Y, et al. High-resolution computed  
654 tomography manifestations of COVID-19 infections in patients of different  
655 ages. *Eur J Radiol.* 2020; 126:108972.
- 656 49. Wan S, Xiang Y, Fang W, Zheng Y, Li B, Hu Y, et al. Clinical features and  
657 treatment of COVID-19 patients in northeast Chongqing. *J Med Virol.* 2020.
- 658 50. Cheng Y, Luo R, Wang K, Zhang M, Wang Z, Dong L, et al. Kidney  
659 disease is associated with in-hospital death of patients with COVID-19.  
660 *Kidney Int.* 2020.
- 661 51. Luo S, Zhang X, Xu H. Don't Overlook Digestive Symptoms in Patients  
662 With 2019 Novel Coronavirus Disease (COVID-19). *Clin Gastroenterol*  
663 *Hepatol.* 2020.
- 664 52. Deng Y, Liu W, Liu K, Fang YY, Shang J, Wang K, et al. Clinical  
665 characteristics of fatal and recovered cases of coronavirus disease 2019  
666 (COVID-19) in Wuhan, China: a retrospective study. *Chin Med J (Engl).*  
667 2020.
- 668 53. Arentz M, Yim E, Klaff L, Lokhandwala S, Riedo FX, Chong M, et al.  
669 Characteristics and Outcomes of 21 Critically Ill Patients With COVID-19  
670 in Washington State. *JAMA.* 2020.
- 671 54. Chen J, Qi T, Liu L, Ling Y, Qian Z, Li T, et al. Clinical progression of  
672 patients with COVID-19 in Shanghai, China. *J Infect.* 2020; 80: e1-e6.
- 673 55. Cai Q, Yang M, Liu D, Chen J, Shu D, Xia J, et al., Experimental Treatment  
674 with Favipiravir for COVID-19: An Open-Label Control Study.  
675 *Engineering.* 2020.
- 676 56. Gao Y, Li T, Han M, Li X, Wu D, Xu Y, et al. Diagnostic utility of clinical



- 677 laboratory data determinations for patients with the severe COVID-19. J  
678 Med Virol. 2020.
- 679 57. Qian GQ, Yang NB, Ding F, Ma AH, Wang ZY, Shen YF, et al.  
680 Epidemiologic and Clinical Characteristics of 91 Hospitalized Patients with  
681 COVID-19 in Zhejiang, China: A retrospective, multi-centre case series.  
682 QJM. 2020.
- 683 58. Mo P, Xing Y, Xiao Y, Deng L, Zhao Q, Wang H, et al. Clinical  
684 characteristics of refractory COVID-19 pneumonia in Wuhan, China. Clin  
685 Infect Dis. 2020.
- 686 59. Cao J, Tu WJ, Cheng W, Yu L, Liu YK, Hu X, et al. Clinical Features of 69  
687 Cases with Coronavirus Disease 2019 in Wuhan, China. Clin Infect Dis.  
688 2020.
- 689 60. Lo IL, Lio CF, Cheong HH, Lei CI, Cheong TH, Zhong X, et al. Evaluation  
690 of SARS-CoV-2 RNA shedding in clinical specimens and clinical  
691 characteristics of 10 patients with COVID-19 in Macau. Int J Biol Sci. 2020;  
692 16:1698-1707.
- 693 61. Cheng Z, Lu Y, Cao Q, Qin L, Pan Z, Yan F, et al. Clinical Features and  
694 Chest CT Manifestations of Coronavirus Disease 2019 (COVID-19) in a  
695 Single-Center Study in Shanghai, China. AJR Am J Roentgenol. 2020; 1-6.
- 696 62. Hsieh WH, Cheng MY, Ho MW, Chou CH, Lin PC, Chi CY, et al. Featuring  
697 COVID-19 cases via screening symptomatic patients with epidemiologic  
698 link during flu season in a medical center of central Taiwan. Journal of  
699 Microbiology, Immunology and Infection. 2020.
- 700 63. Wu C, Chen X, Cai Y, Zhou X, Xu S, Huang H, et al. Risk Factors  
701 Associated With Acute Respiratory Distress Syndrome and Death in Patients  
702 With Coronavirus Disease 2019 Pneumonia in Wuhan, China. JAMA Intern  
703 Med. 2020.

- 704 64. Qin C, Zhou L, Hu Z, Zhang S, Yang S, Tao Y, et al. Dysregulation of  
705 immune response in patients with COVID-19 in Wuhan, China. *Clin Infect*  
706 *Dis*, 2020.
- 707 65. Zhao D, Yao F, Wang L, Zheng L, Gao Y, Ye J, et al., A comparative study  
708 on the clinical features of COVID-19 pneumonia to other pneumonias. *Clin*  
709 *Infect Dis*. 2020.
- 710 66. Liu K, Chen Y, Lin R, Han K. Clinical features of COVID-19 in elderly  
711 patients: A comparison with young and middle-aged patients. *J Infect*, 2020.
- 712 67. Zhou, F., et al., Clinical course and risk factors for mortality of adult  
713 inpatients with COVID-19 in Wuhan, China: a retrospective cohort study.  
714 *Lancet*. 2020; 395:1054-1062.
- 715 68. Xiong Y, Sun D, Liu Y, Fan Y, Zhao L, Li X, et al. Clinical and High-  
716 Resolution CT Features of the COVID-19 Infection: Comparison of the  
717 Initial and Follow-up Changes. *Invest Radiol*. 2020.
- 718 69. Fan BE, Chong VC, Chan SS, Lim GH, Lim KG, Tan GB, et al.,  
719 Hematologic parameters in patients with COVID-19 infection. *Am J*  
720 *Hematol*. 2020.
- 721 70. Young BE, Ong SW, Kalimuddin S, Low JG, Tan SY, Loh J, et al.  
722 Epidemiologic Features and Clinical Course of Patients Infected With  
723 SARS-CoV-2 in Singapore. *JAMA*. 2020.
- 724 71. Wu J, Liu J, Zhao X, Liu C, Wang W, Wang D, et al. Clinical  
725 Characteristics of Imported Cases of COVID-19 in Jiangsu Province: A  
726 Multicenter Descriptive Study. *Clin Infect Dis*. 2020.
- 727 72. Li K, Wu J, Wu F, Guo D, Chen L, Fang Z, et al. The Clinical and Chest CT  
728 Features Associated with Severe and Critical COVID-19 Pneumonia. *Invest*  
729 *Radiol*. 2020.
- 730 73. Liu W, Tao ZW, Wang L, Yuan ML, Liu K, Zhou L, et al. Analysis of

- 731 factors associated with disease outcomes in hospitalized patients with 2019  
732 novel coronavirus disease. *Chin Med J (Engl)*. 2020.
- 733 74. Yang W, Cao Q, Qin L, Wang X, Cheng Z, Pan A, et al. Clinical  
734 characteristics and imaging manifestations of the 2019 novel coronavirus  
735 disease (COVID-19): A multi-center study in Wenzhou city, Zhejiang,  
736 China. *J Infect*. 2020; 80: 388-393.
- 737 75. Wu J, Wu X, Zeng W, Guo D, Fang Z, Chen L, et al. Chest CT Findings in  
738 Patients With Coronavirus Disease 2019 and Its Relationship With Clinical  
739 Features. *Invest Radiol*. 2020; 55:257-261.
- 740 76. Shi H, Han X, Jiang N, Cao Y, Alwalid O, Gu J, et al. Radiological findings  
741 from 81 patients with COVID-19 pneumonia in Wuhan, China: a descriptive  
742 study. *Lancet Infect Dis*. 2020.
- 743 77. Yang X, Yu Y, Xu J, Shu H, Liu H, Wu Y, et al. Clinical course and  
744 outcomes of critically ill patients with SARS-CoV-2 pneumonia in Wuhan,  
745 China: a single-centered, retrospective, observational study. *Lancet Respir  
746 Med*. 2020.
- 747 78. Zhang JJ, Dong X, Cao YY, Yuan YD, Yang YB, Yan YQ, et al. Clinical  
748 characteristics of 140 patients infected with SARS-CoV-2 in Wuhan, China.  
749 *Allergy*. 2020.
- 750 79. Zhou W, Liu Y, Tian D, Wang C, Wang S, Cheng J, et al. Potential benefits  
751 of precise corticosteroids therapy for severe 2019-nCoV pneumonia. *Signal  
752 Transduction and Targeted Therapy*. 2020; 5(1).
- 753 80. Xu XW, Wu XX, Jiang XG, Xu KJ, Ying LJ, Ma CL, et al. Clinical findings  
754 in a group of patients infected with the 2019 novel coronavirus (SARS-Cov-  
755 2) outside of Wuhan, China: retrospective case series. *BMJ*. 2020; 368:  
756 m606.
- 757 81. Pan F, Ye T, Sun P, Gui S, Liang B, Li L, et al. Time Course of Lung

- 758 Changes On Chest CT During Recovery From 2019 Novel Coronavirus  
759 (COVID-19) Pneumonia. *Radiology*. 2020; 200370.
- 760 82. Chang D, Lin M, Wei L, Xie L, Zhu G, Cruz CS, et al. Epidemiologic and  
761 Clinical Characteristics of Novel Coronavirus Infections Involving 13  
762 Patients Outside Wuhan, China. *JAMA*. 2020; 323:1092-1093.
- 763 83. Wang D, Hu B, Hu C, Zhu F, Liu X, Zhang J, et al. Clinical Characteristics  
764 of 138 Hospitalized Patients With 2019 Novel Coronavirus–Infected  
765 Pneumonia in Wuhan, China. *JAMA*. 2020; 323: 1061-1069.

### **Supporting Materials:**

#### **- Table S1 PRISMA Checklist.**

#### **766 - Fig S1 Publication bias**

767 Funnel plot of standard error by the standardized difference in means for (A) White  
768 blood cells, (B) Neutrophil count, (C) Lymphocyte count, (D) Procalcitonin, and  
769 (E) C-reactive protein. The standard error provides a measure of the precision of  
770 the effect size as an estimate of the population parameter. It starts with zero at the  
771 top. Studies with smaller sample sizes produce less precise estimated effects with a  
772 broader base. The pooled estimated effects would be expected to scatter  
773 symmetrically around the total overall estimate of the meta-analysis (represented  
774 by the vertical line). Each circle represents a study (black circle). In the case of  
775 asymmetry, Duval and Tweedie's trim and fill method predict the missing studies  
776 (red circle). Begg's and Egger's tests were performed. *P* values <0.1 were set to  
777 have a significant bias.

(A)

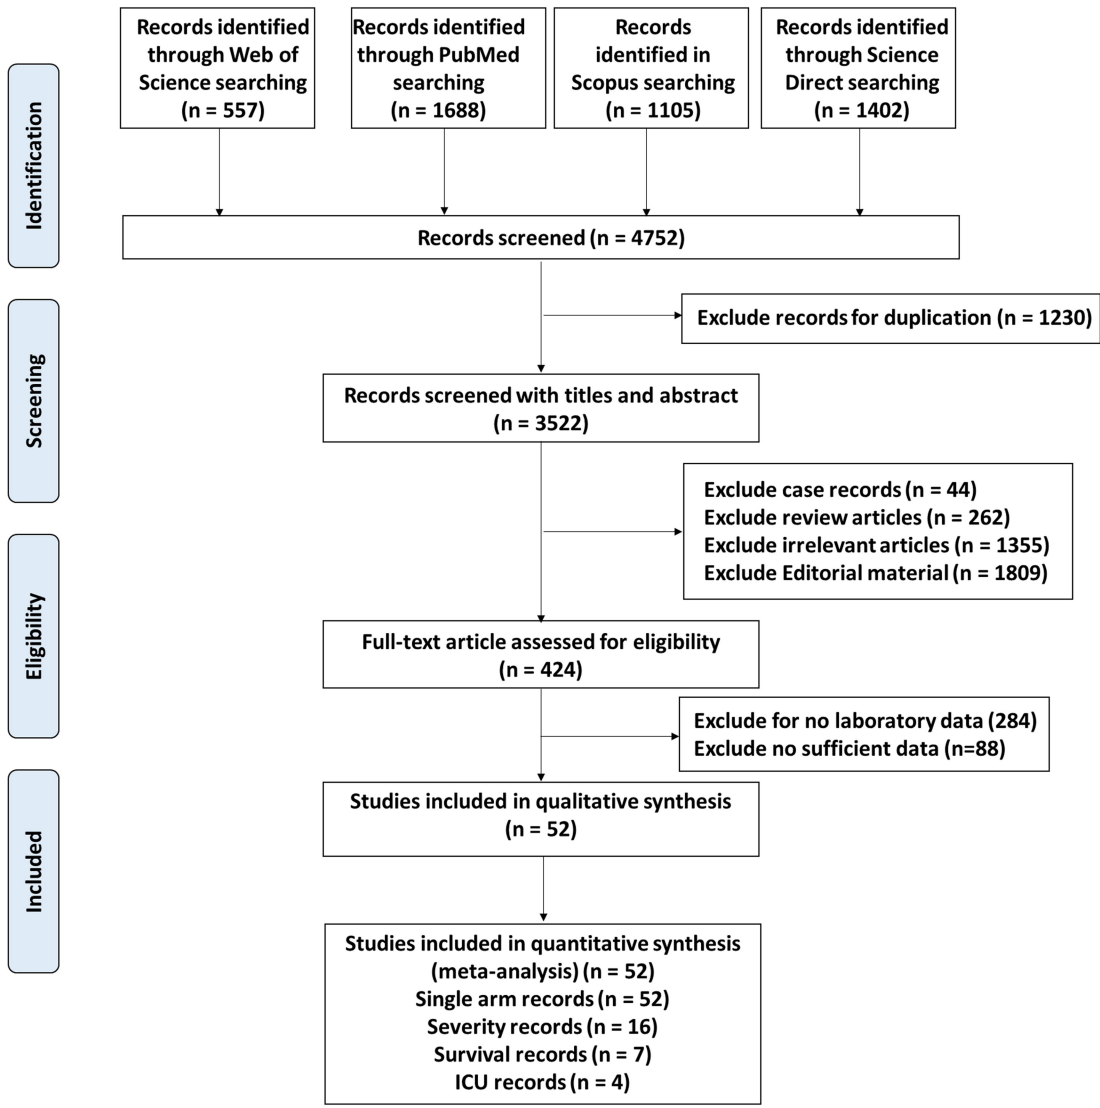

(B)

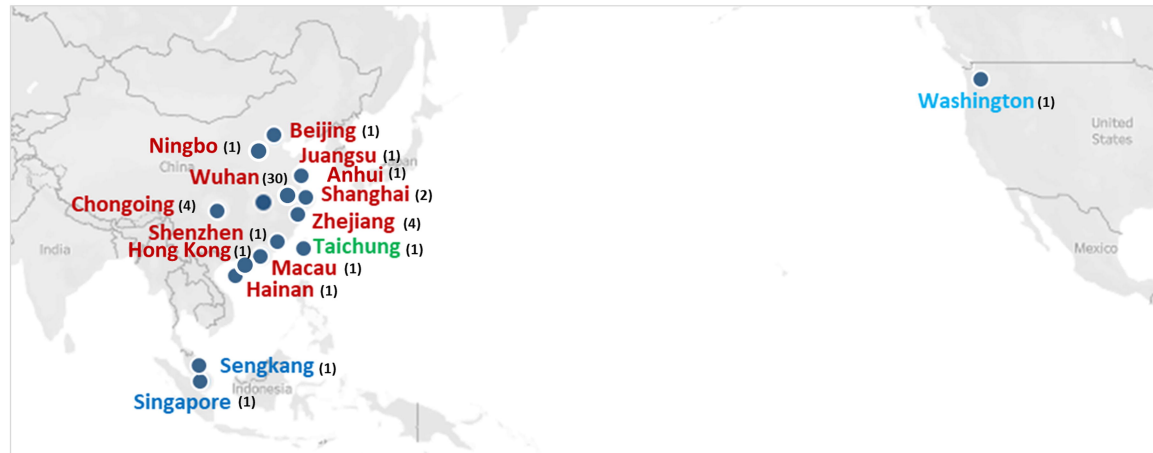

# Cumulative Z-score

## Neutrophil count

Sample size = 1,558

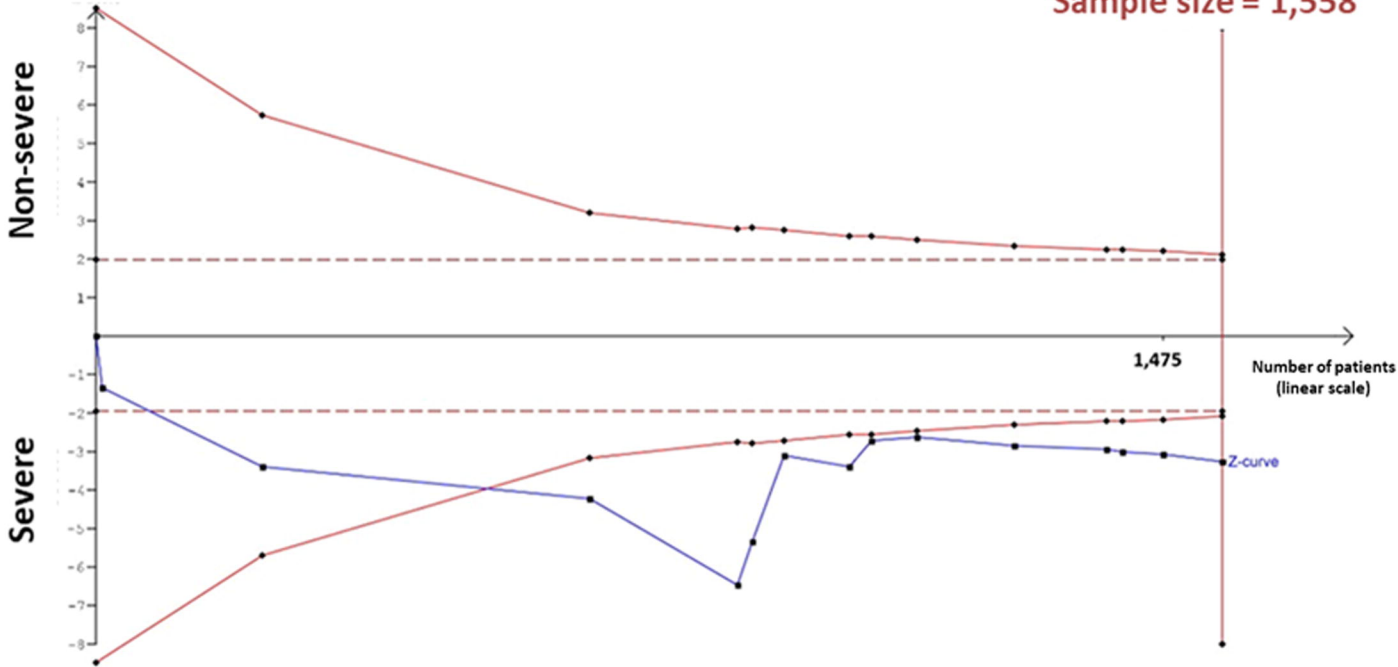

Source: https://medrxiv.org/content/10.1101/2020.07.08.20141218v1.full.pdf
